# Supplementary material for: Engineering hybrid exosomes by membrane fusion with liposomes
Source: PubMed Central journal article supplement (PMC4766490; doi:10.1038/srep21933), 2016-02-25
Supplement: srep21933-s1.pdf [file srep21933-s1.pdf]

## **Engineering hybrid exosomes by membrane fusion with liposomes**

*Yuko. T. Sato<sup>1</sup>, Kaori Umezaki<sup>1</sup>, Shinichi Sawada<sup>1,2</sup>, Sada-atsu Mukai<sup>1,2</sup>, Yoshihiro Sasaki<sup>2</sup>, Naozumi Harada<sup>3</sup>, Hiroshi Shiku<sup>3</sup> and Kazunari Akiyoshi<sup>1,2,\*</sup>*

<sup>1</sup>Japan Science and Technology Agency (JST), The Exploratory Research for Advanced Technology (ERATO), Bio-nanotransporter Project, Katsura Int'tech Center, Katsura, Nishikyo-ku, Kyoto 615-8530, Japan

<sup>2</sup>Department of Polymer Chemistry, Graduate School of Engineering, Kyoto University, Katsura, Nishikyo-ku, Kyoto, 615-8510, Japan

<sup>3</sup> Department of Immuno-Gene Therapy, Graduate School of Medicine, Mie University, Tsu 514-8507, Japan

## Supplementary Table S1

**Table S1.** Average size of Raw 264.7 exosomes or exosome-liposome hybrids after freeze-thawing. The diameters were evaluated by nanoparticle tracking analysis.

| Exosome | Phospholipid  | Size / nm |
|---------|---------------|-----------|
| +       | -             | 150 ± 100 |
| +       | DOPC          | 230 ± 170 |
| +       | DOPS          | 250 ± 200 |
| +       | DOTAP         | 210 ± 110 |
| +       | DOPS/PEG-DSPE | 190 ± 80  |

## Supplementary Figures S1-S4

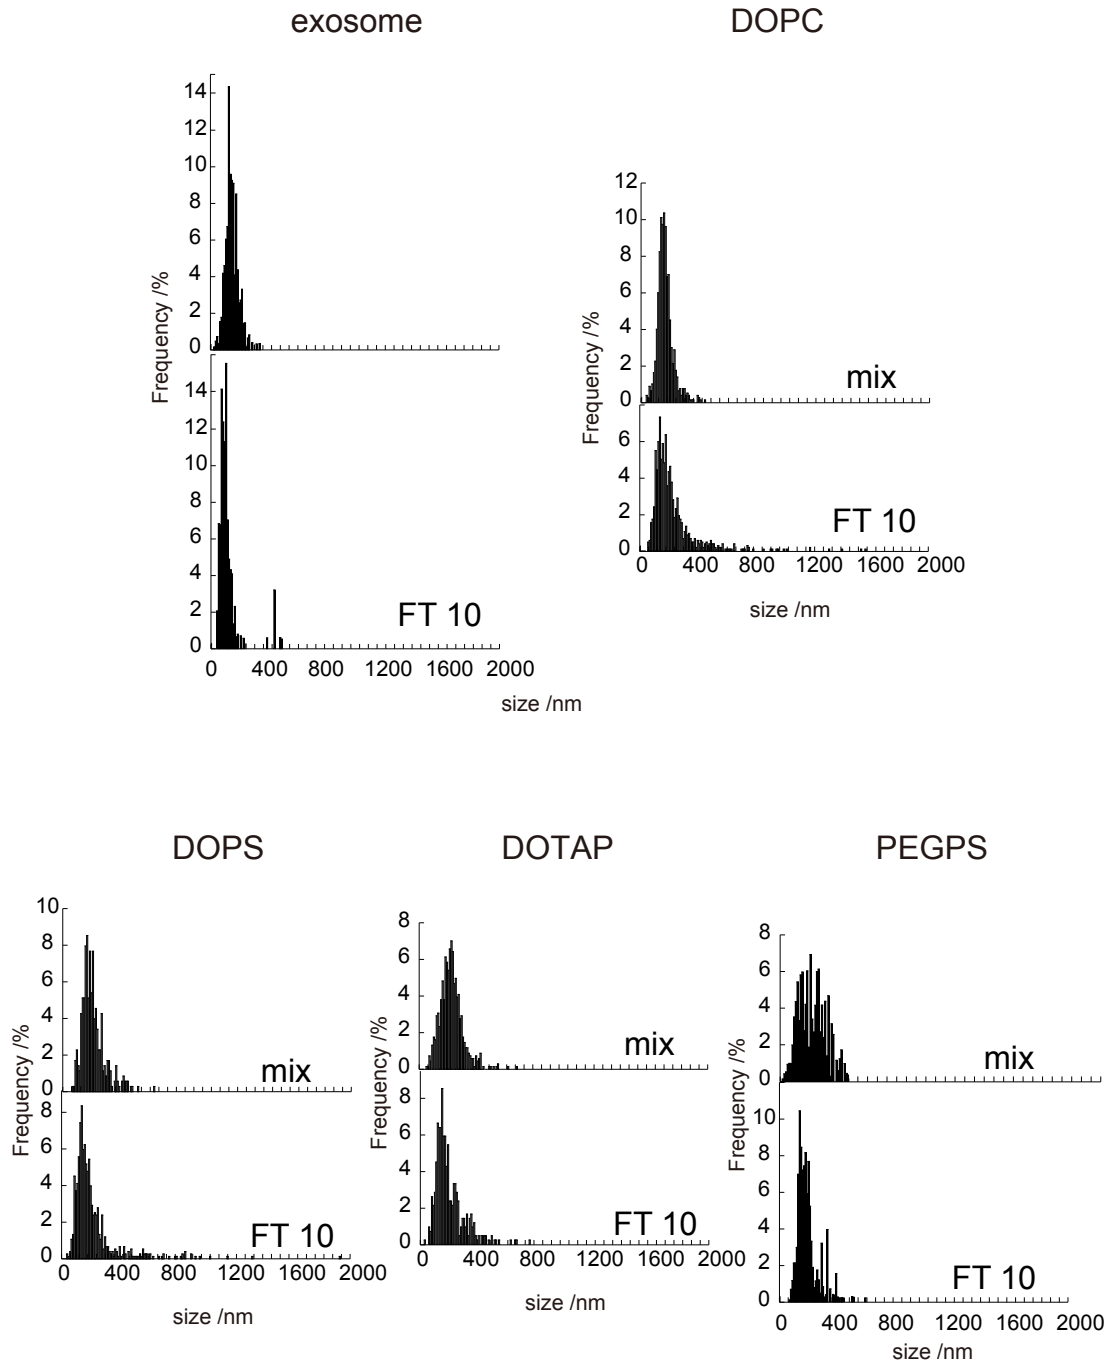

**Figure S1** | Size distribution of exosome or exosome-liposome mixture before (mix) and after freeze-thawing (FT10) measured by nano particle tracking assay.

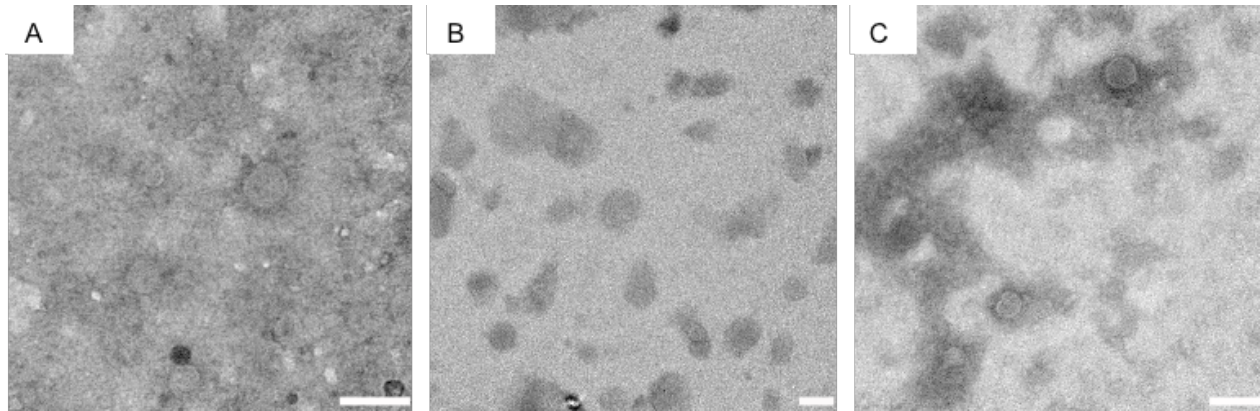

**Figure S2** | Exosome as observed by transmission electron microscopy. A) exosomes, B) DOPS liposomes, C ) exosomes-DOPS hybrid prepared by freeze-thawing. Scale bars represent 100 nm. Exosomes were placed on 100-mesh formvar/carbon coated copper grids pretreated with 1% alcian blue for 3 min. After rinsing with distilled water, exosomes in 2% paraformaldehyde (PFA) were dropped on grids and air-dried. Samples were stained with 2.5% phosphotungstic acid and observed by a HT7700-Transmission electron microscope (Hitachi, Japan) at an accelerating voltage of 100 kV.

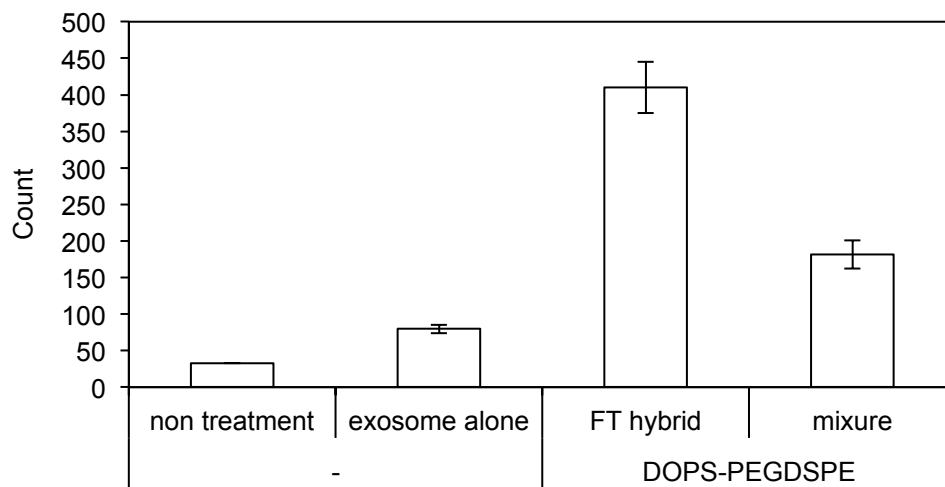

**Figure S3** | Effect of freeze-thawing on the cellular uptake efficiency. The efficiencies were evaluated by mean fluorescence intensities of cells determined by flow cytometry with or without treatment of freeze-thawing to the mixture of exosome and DOPS/PEGDSPE liposome. Statistical significance was evaluated by t-test from 3 times of FACS analysis ( $p < 0.01$ ).

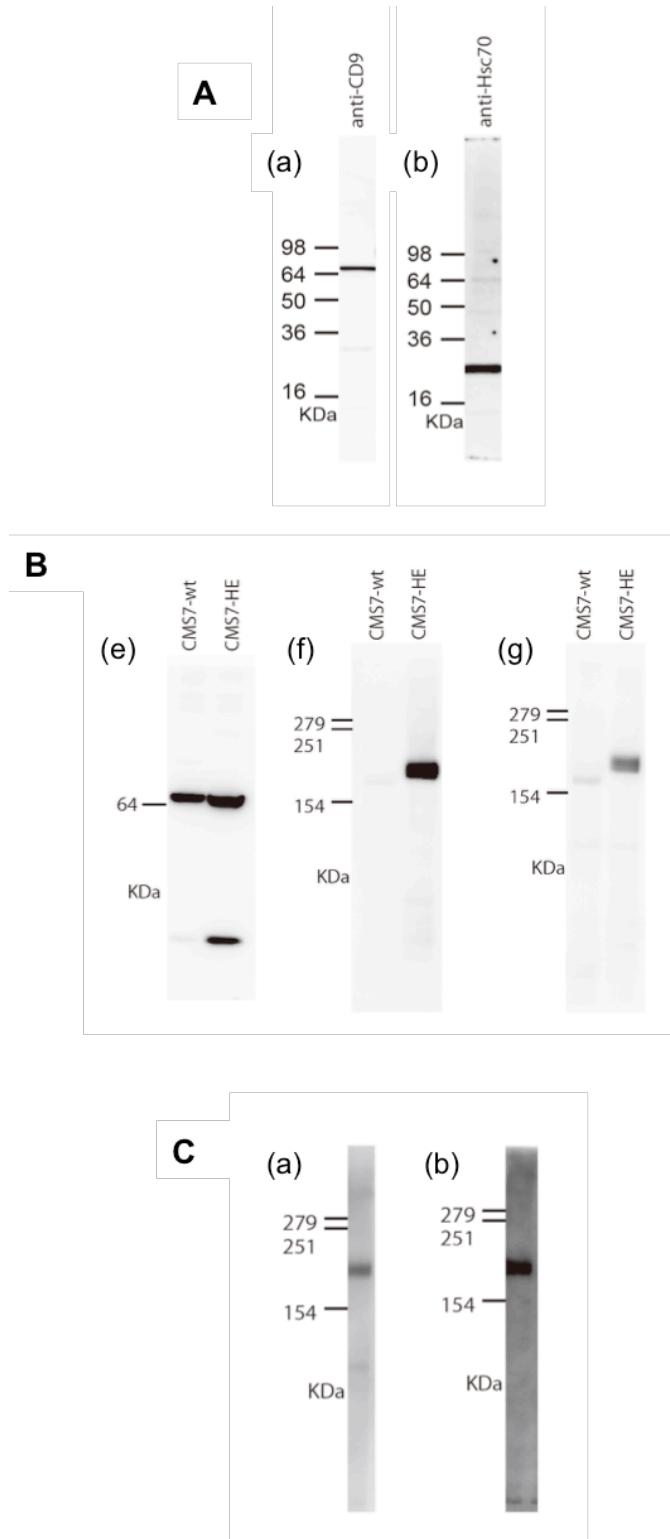

**Figure S4** | Full length of image of western blotting for Figure 2 a, b (A), Figure 4 e, f, g (B) and Figure 5 (C).
